# Supplementary material for: Use of systemic hormonal contraception and risk of attempted suicide
Source: medRxiv preprint, doi:10.1101/2022.06.14.22276379, version 1 (2022-06-16)
Supplement: Heading Supplemental Figure 1 [file 276379_file04.docx]

**Figure S1.** **Associations between attempted suicide and current use (in the previous 180 days) of hormonal contraceptives**. Results are expressed as Odds Ratios with 95% Confidence Intervals. For each substance the reference category is no use of the same substance in the 180 days before the attempted suicide. Adjusted model is controlled for marital status, socioeconomic status, education, chronic diseases and recent delivery. One substance in model a time. Care Register of Health Care data only.
