# Supplementary material for: Use of systemic hormonal contraception and risk of attempted suicide
Source: bioRxiv or medRxiv preprint supplement (doi:10.1101/2022.06.14.22276379), 2022-06-16

### Model

■ Unadjusted 
 ■ Adjusted 
 ■ Adjusted after exclusion of psychiatric disorders 
 ■ Adjusted for recent psychiatric hospitalizations or medications

### Contraceptive

OR

95% CI

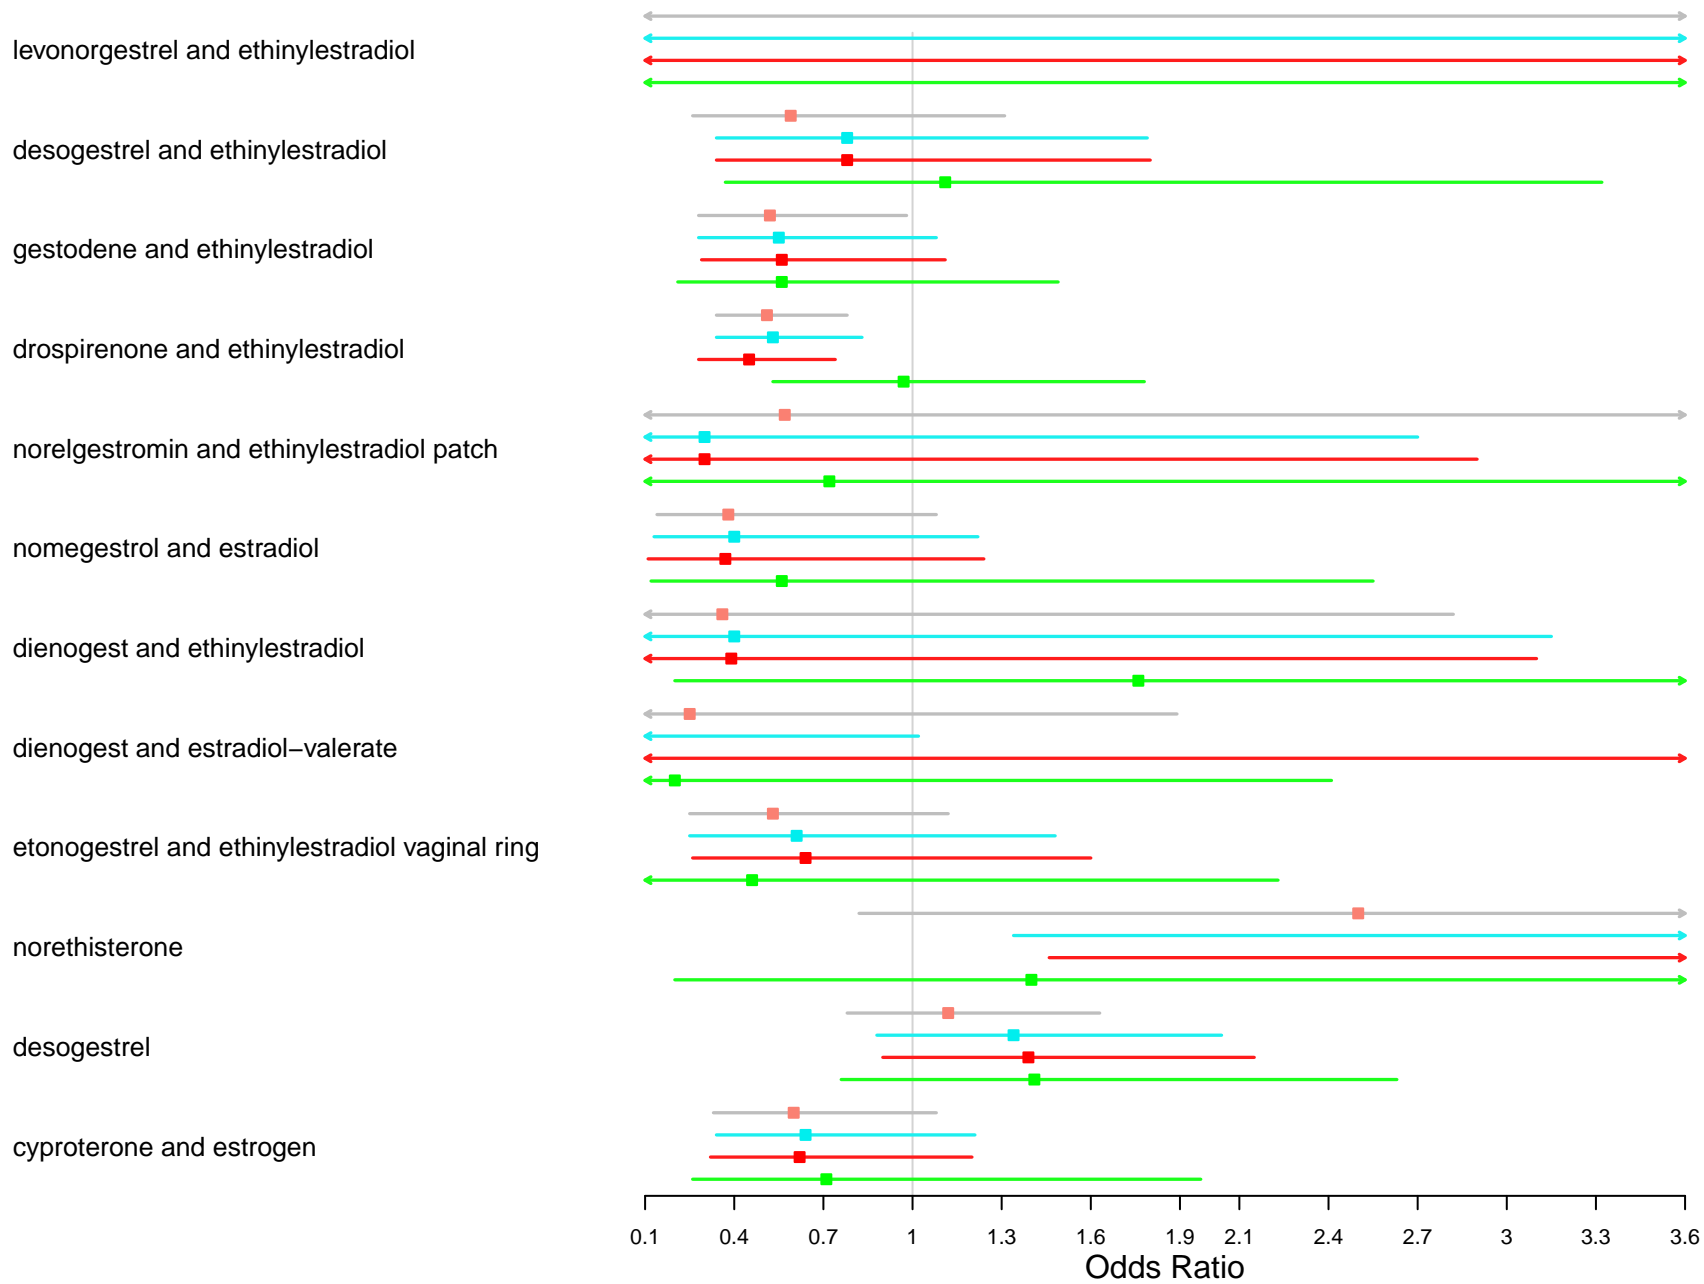

Supplement: Supplementary file [file media-2.pdf]
